# Supplementary material for: Health-related quality of life in patients with newly diagnosed multiple myeloma ineligible for stem cell transplantation: results from the randomized phase III ALCYONE trial
Source: PubMed Central journal article supplement (PMC8170980; doi:10.1186/s12885-021-08325-2), 2021-06-02

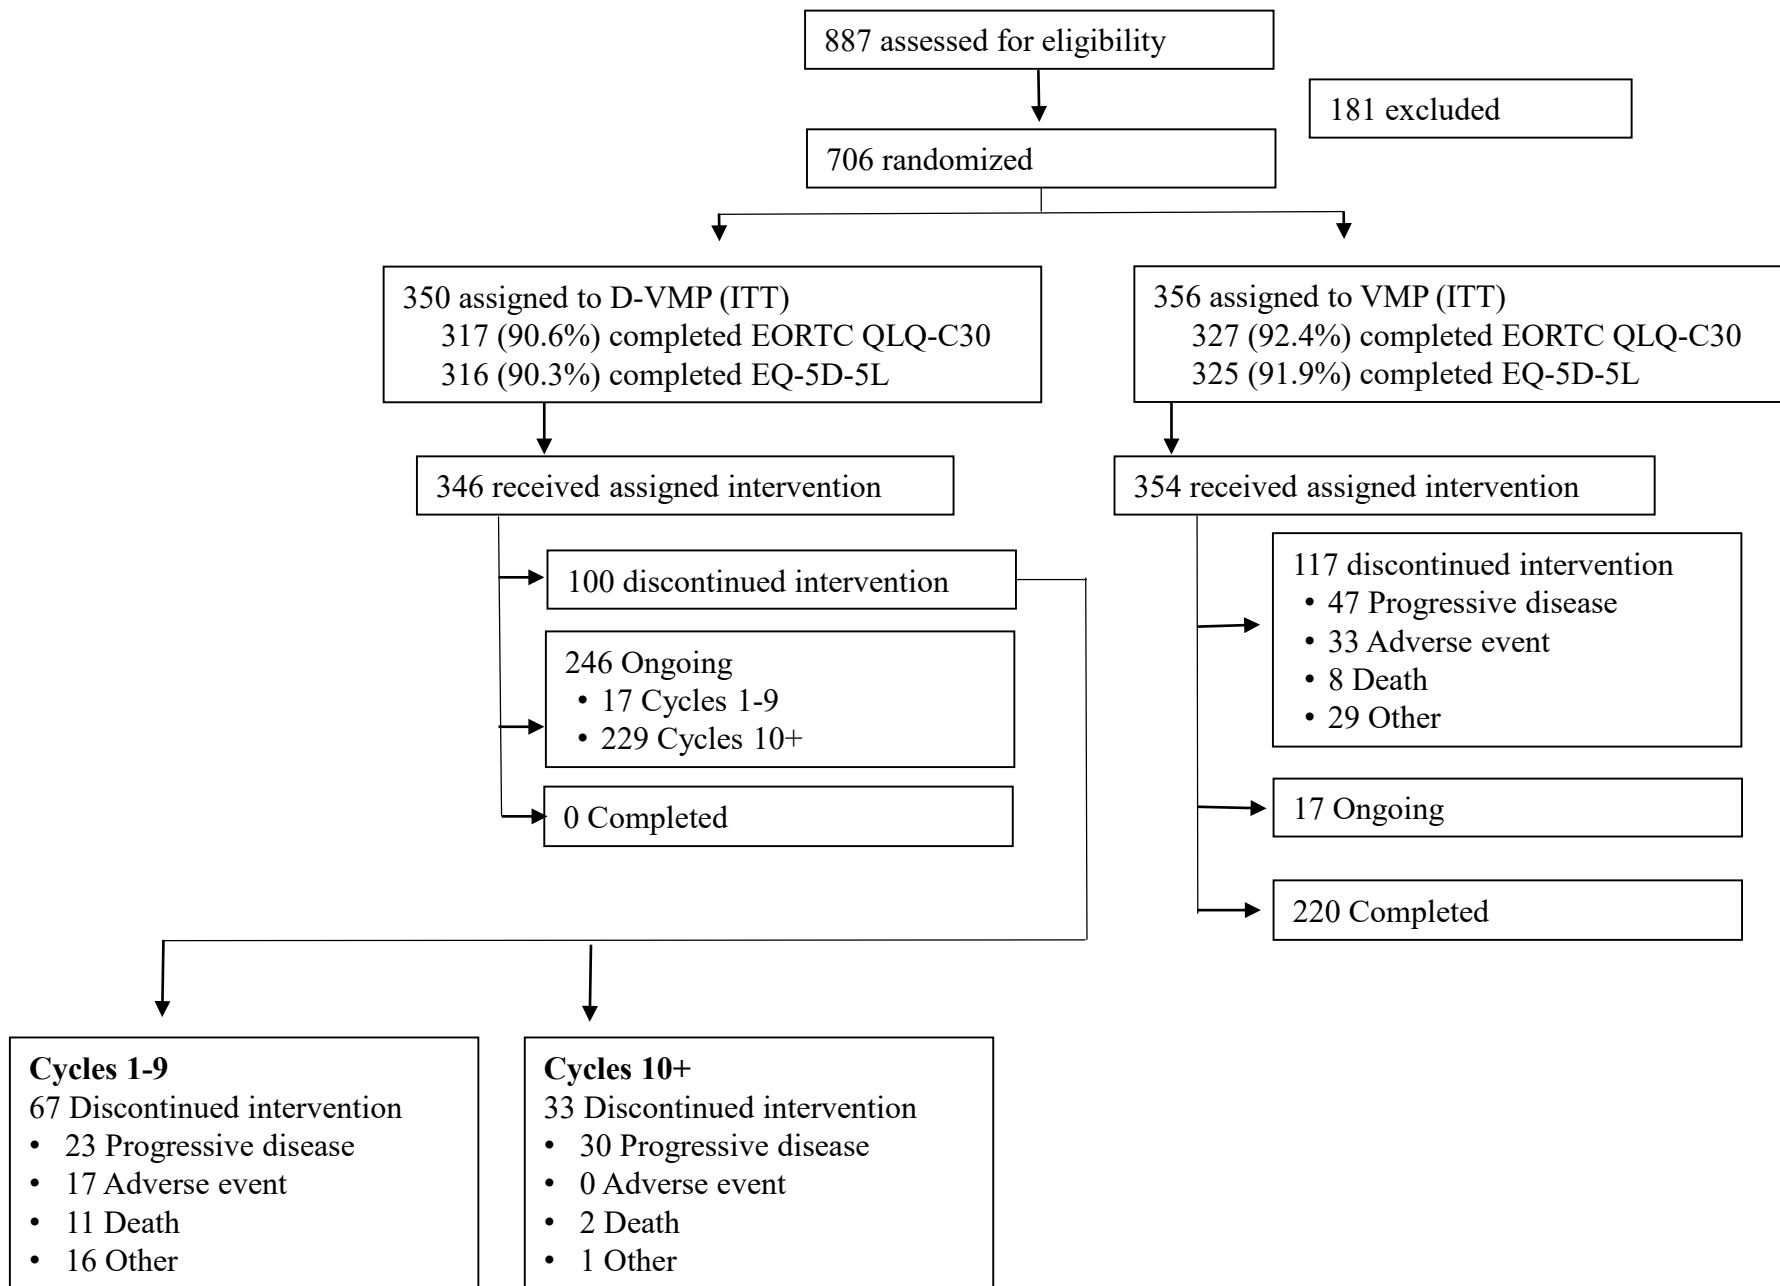

Supplement: 12885_2021_8325_MOESM1_ESM.pdf [file 12885_2021_8325_MOESM1_ESM.pdf]
